# Supplementary material for: Prolonged release of silver and iodine from ZIF-7 carrier with great antibacterial activity
Source: Royal Society of Chemistry journal article supplement (doi:10.1039/d3ce00529a), 2023-01-01
Supplement: d3ce00529a1.pdf [file d3ce00529a1.pdf]

Supporting Information

**Prolonged Release of Silver and Iodine from ZIF-7 Carrier with Great  
Antibacterial Activity**

Alireza Davoodi <sup>a</sup>, Kamran Akhbari <sup>a,\*</sup>, Mohammadreza Alirezvani <sup>b</sup>

<sup>a</sup> School of Chemistry, College of Science, University of Tehran, Tehran, Iran.

P.O. Box 14155-6455; Tel.: +98 21 61113734; fax: +98 21 66495291. E-mail address:

[akhbari.k@ut.ac.ir](mailto:akhbari.k@ut.ac.ir)

<sup>b</sup> Department of Civil Engineering, Iran University of Science and Technology, Tehran, Iran.

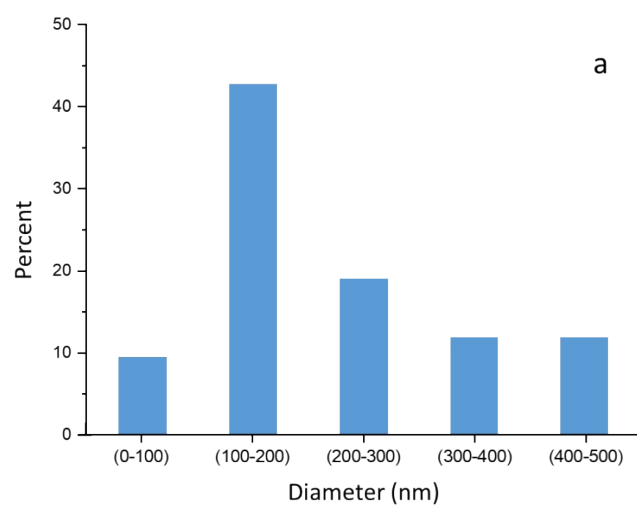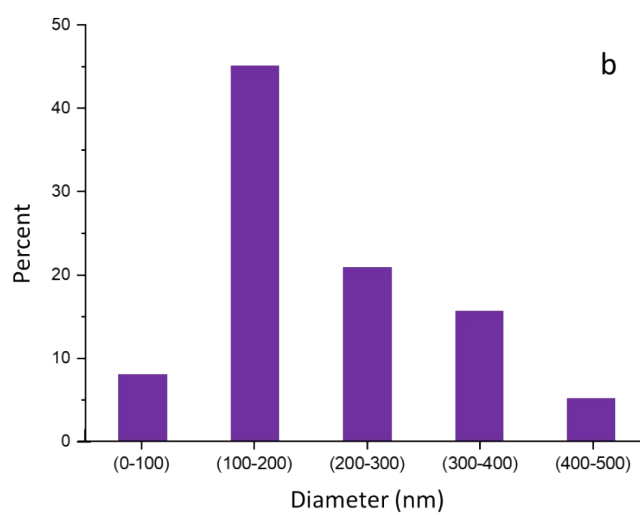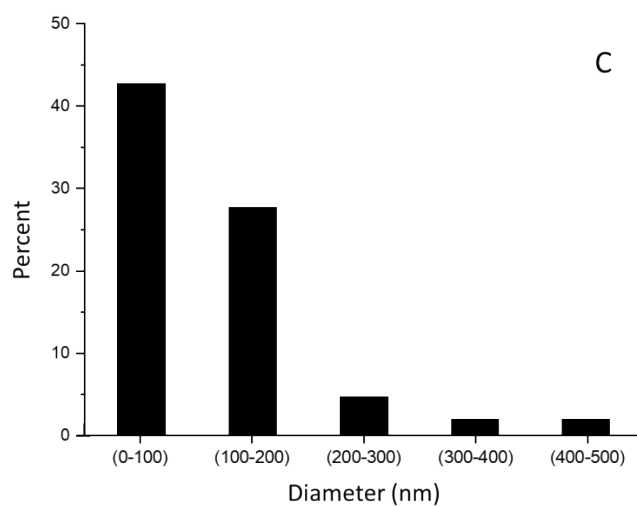

**Figure S1.** Particle size distribution histograms of a) ZIF-7, b) I<sub>2</sub>@ZIF-7, and c) Ag@ZIF-7

a.

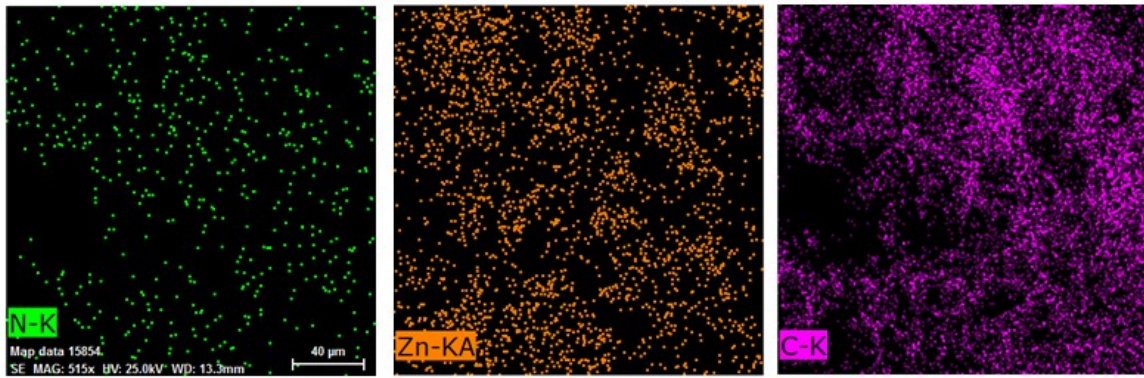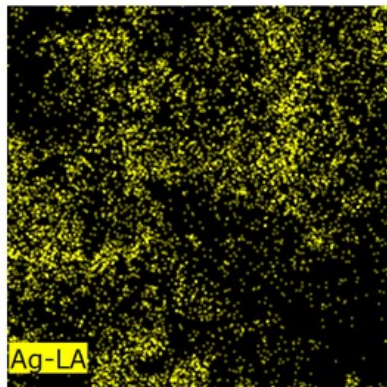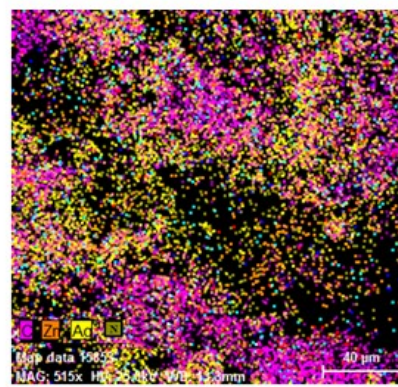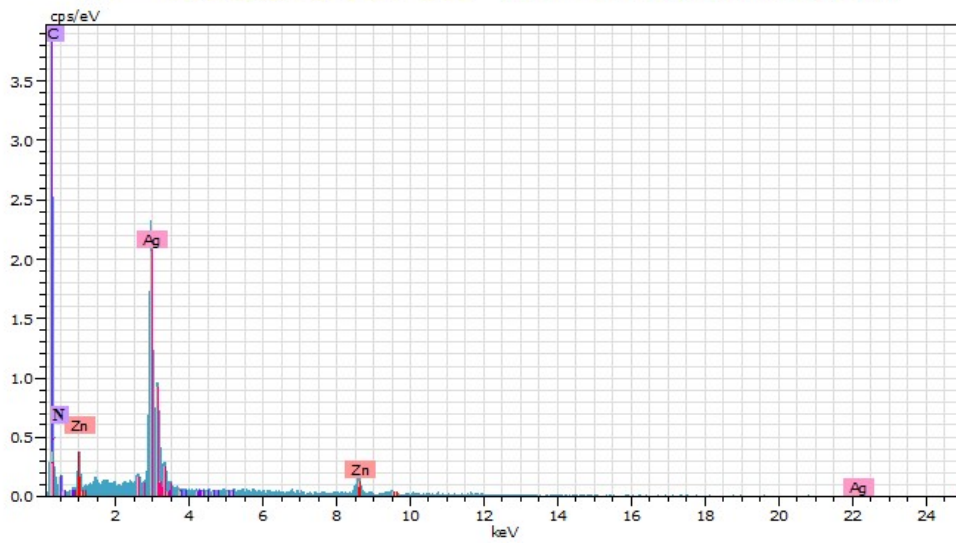

b.

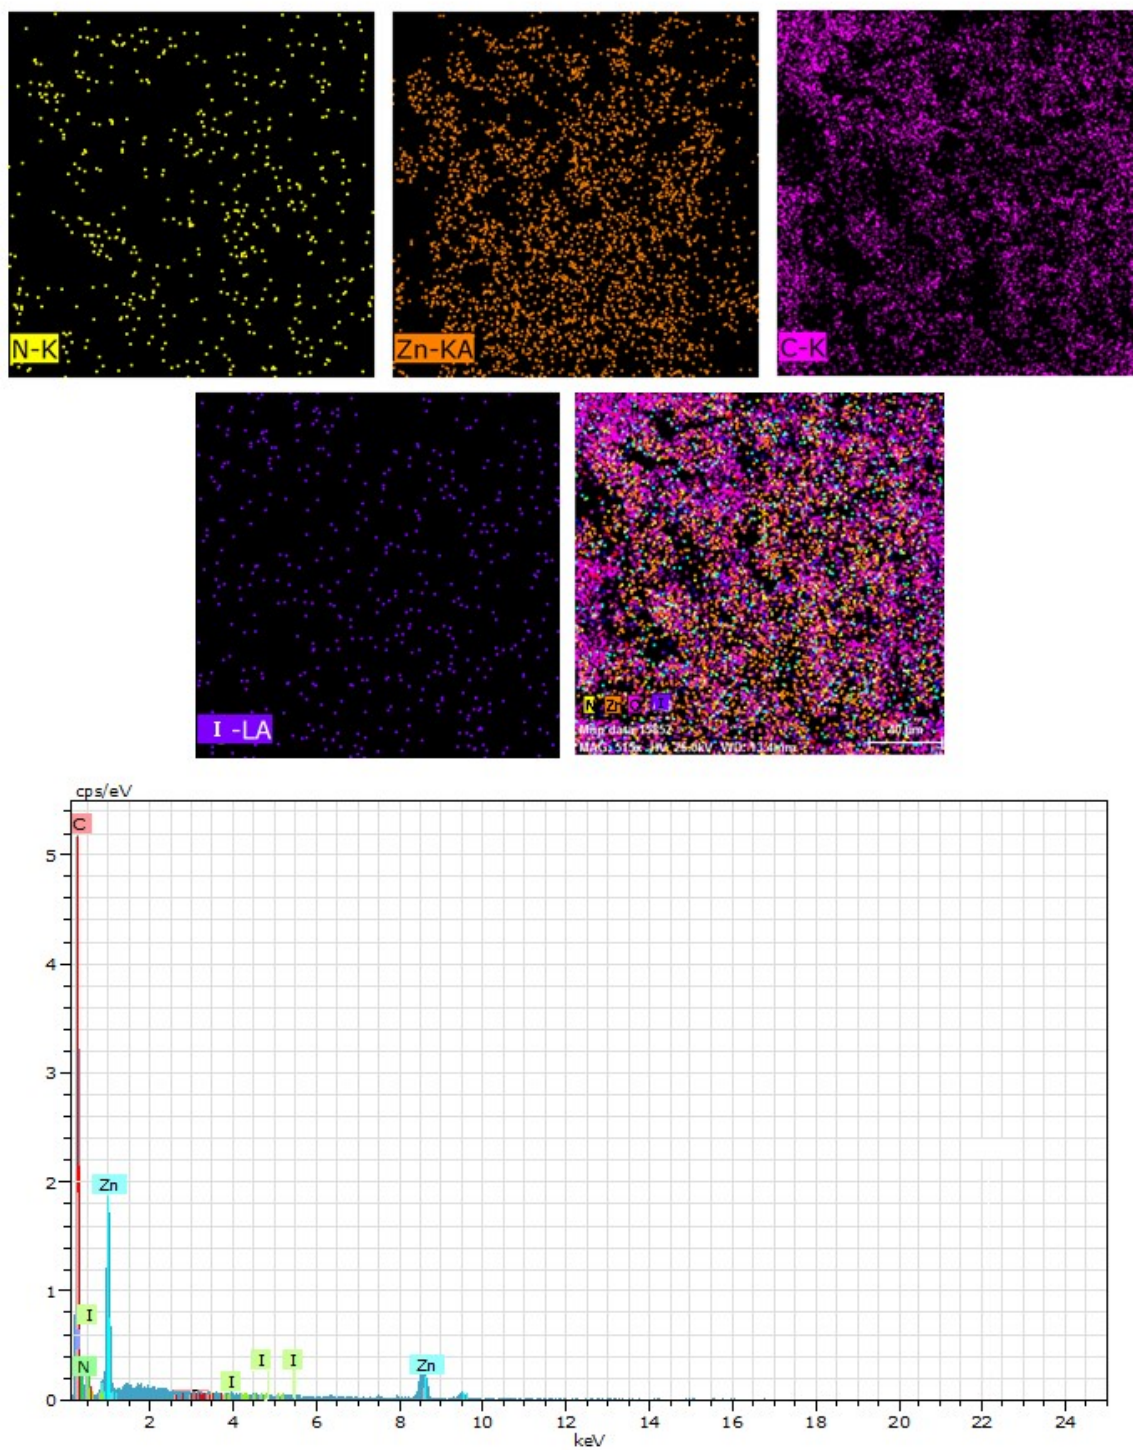

**Figure S2.** EDS-mapping and EDS spectra of a)  $Ag@ZIF-7$ , and b)  $I_2@ZIF-7$ .

**Table S1.** Elemental analysis (mass percent) from EDS of ZIF-7, Ag@ZIF-7 and I<sub>2</sub>@ZIF-7.

| Elements         | ZIF-7 | Ag@ZIF-7 | I <sub>2</sub> @ZIF-7 |
|------------------|-------|----------|-----------------------|
| <sup>6</sup> C   | 75.98 | 58.83    | 67.4                  |
| <sup>7</sup> N   | 14.85 | 5.03     | 12.55                 |
| <sup>30</sup> Zn | 9.17  | 6.3      | 13.66                 |
| <sup>47</sup> Ag | 0     | 29.84    | 0                     |
| <sup>53</sup> I  | 0     | 0        | 6.39                  |
